# Supplementary material
Source: PubMed Central journal article supplement (PMC3117070)
Supplement: NIHMS232451-supplement-01.pdf [file NIHMS232451-supplement-01.pdf]

**Supplemental table.** SNPs genotyped in this study

| CHR | Gene  | SNP        | BP location | Allele1 | Allele2 | All |      | Cases |      | Controls |      |
|-----|-------|------------|-------------|---------|---------|-----|------|-------|------|----------|------|
|     |       |            |             |         |         | N   | MAF  | N     | MAF  | N        | MAF  |
| 10  | IDE   | rs1887922  | 94214145    | C       | T       | 454 | 0.18 | 160   | 0.18 | 294      | 0.17 |
| 10  | IDE   | rs4646957  | 94219892    | T       | C       | 453 | 0.45 | 160   | 0.44 | 293      | 0.47 |
| 10  | IDE   | rs2149632  | 94222227    | C       | T       | 454 | 0.22 | 160   | 0.23 | 294      | 0.23 |
| 10  | IDE   | rs3737225  | 94239962    | A       | G       | 453 | 0.03 | 159   | 0.02 | 294      | 0.03 |
| 10  | IDE   | rs11187025 | 94247956    | T       | C       | 454 | 0.18 | 160   | 0.16 | 294      | 0.18 |
| 10  | IDE   | rs7078413  | 94280464    | C       | A       | 454 | 0.28 | 160   | 0.29 | 294      | 0.28 |
| 10  | IDE   | rs11187060 | 94294112    | T       | C       | 454 | 0.33 | 160   | 0.34 | 294      | 0.34 |
| 10  | IDE   | rs11187062 | 94296406    | C       | T       | 454 | 0.08 | 160   | 0.06 | 294      | 0.08 |
| 10  | IDE   | rs11187064 | 94298233    | C       | T       | 454 | 0.18 | 160   | 0.18 | 294      | 0.18 |
| 10  | IDE   | rs2421943  | 94301795    | A       | G       | 445 | 0.31 | 156   | 0.32 | 289      | 0.32 |
| 10  | IDE   | rs7908111  | 94304784    | A       | G       | 454 | 0.18 | 160   | 0.18 | 294      | 0.17 |
| 10  | IDE   | rs1999763  | 94309972    | A       | G       | 454 | 0.11 | 160   | 0.11 | 294      | 0.11 |
| 10  | IDE   | rs12264682 | 94312407    | A       | C       | 454 | 0.04 | 160   | 0.05 | 294      | 0.04 |
| 10  | IDE   | rs7100623  | 94317136    | T       | C       | 454 | 0.18 | 160   | 0.18 | 294      | 0.17 |
| 10  | KIF11 | rs6583826  | 94337810    | G       | A       | 454 | 0.50 | 160   | 0.49 | 294      | 0.49 |
| 10  | KIF11 | rs12256435 | 94343258    | T       | G       | 454 | 0.10 | 160   | 0.12 | 294      | 0.09 |
| 10  | KIF11 | rs3824735  | 94344184    | C       | A       | 454 | 0.24 | 160   | 0.24 | 294      | 0.26 |
| 10  | KIF11 | rs11187094 | 94358158    | A       | G       | 454 | 0.14 | 160   | 0.17 | 294      | 0.14 |
| 10  | KIF11 | rs10882088 | 94358568    | C       | T       | 454 | 0.11 | 160   | 0.11 | 294      | 0.12 |
| 10  | KIF11 | rs2275220  | 94362686    | C       | T       | 454 | 0.03 | 160   | 0.02 | 294      | 0.03 |
| 10  | KIF11 | rs10882091 | 94364357    | C       | T       | 454 | 0.31 | 160   | 0.31 | 294      | 0.30 |
| 10  | KIF11 | rs7914814  | 94372930    | T       | C       | 454 | 0.31 | 160   | 0.31 | 294      | 0.30 |
| 10  | KIF11 | rs11818705 | 94382708    | T       | C       | 454 | 0.18 | 160   | 0.17 | 294      | 0.19 |
| 10  | KIF11 | rs7070990  | 94384580    | T       | C       | 434 | 0.33 | 151   | 0.33 | 283      | 0.32 |
| 10  | KIF11 | rs6583830  | 94388098    | A       | G       | 454 | 0.31 | 160   | 0.31 | 294      | 0.30 |
| 10  | KIF11 | rs7917359  | 94394804    | T       | C       | 452 | 0.18 | 160   | 0.17 | 292      | 0.18 |
| 10  | KIF11 | rs7078243  | 94404243    | A       | C       | 452 | 0.41 | 159   | 0.42 | 293      | 0.41 |

|    |      |            |          |   |   |     |      |     |      |     |      |
|----|------|------------|----------|---|---|-----|------|-----|------|-----|------|
| 10 | HHEX | rs2275729  | 94442410 | C | A | 454 | 0.12 | 160 | 0.15 | 294 | 0.12 |
| 10 | HHEX | rs7100035  | 94451033 | T | C | 454 | 0.06 | 160 | 0.05 | 294 | 0.06 |
| 10 | HHEX | rs1111875  | 94452862 | A | G | 454 | 0.30 | 160 | 0.28 | 294 | 0.32 |
| 10 | HHEX | rs12778642 | 94454287 | T | G | 454 | 0.39 | 160 | 0.37 | 294 | 0.41 |
| 10 | HHEX | rs5015480  | 94455539 | T | C | 454 | 0.39 | 160 | 0.38 | 294 | 0.39 |

**Supplemental Table 2.** Single marker associations for all 32 SNPs in the *IDE-KIF11-HHEX* complex and plasma A $\beta$ 40 and A $\beta$ 42 levels

| Gene | SNP        | BP       | Minor allele | A $\beta$ 40 |      |      |               |      |      |                  |      |      | A $\beta$ 42 |     |      |               |      |      |                  |     |      |
|------|------------|----------|--------------|--------------|------|------|---------------|------|------|------------------|------|------|--------------|-----|------|---------------|------|------|------------------|-----|------|
|      |            |          |              | ALL (n=454)  |      |      | Cases (n=160) |      |      | Controls (n=294) |      |      | ALL (n=454)  |     |      | Cases (n=160) |      |      | Controls (n=294) |     |      |
|      |            |          |              | BETA         | SE   | P    | BETA          | SE   | P    | BETA             | SE   | P    | BETA         | SE  | P    | BETA          | SE   | P    | BETA             | SE  | P    |
| IDE  | rs1887922  | 94214145 | C            | -4.3         | 4.8  | 0.37 | -4.5          | 7.8  | 0.57 | -4.1             | 6.2  | 0.5  | 1.9          | 2.2 | 0.38 | 1.4           | 3.5  | 0.69 | 2.1              | 2.8 | 0.45 |
| IDE  | rs4646957  | 94219892 | T            | -2.9         | 3.6  | 0.43 | -5.7          | 6.2  | 0.36 | -1.3             | 4.5  | 0.77 | -1.4         | 1.6 | 0.37 | -3.1          | 2.8  | 0.27 | -0.7             | 2   | 0.72 |
| IDE  | rs2149632  | 94222227 | C            | 4.1          | 4.2  | 0.33 | 6.7           | 7.4  | 0.36 | 2.7              | 5.1  | 0.59 | 2.1          | 1.9 | 0.28 | 5.8           | 3.3  | 0.08 | 0.5              | 2.3 | 0.82 |
| IDE  | rs3737225  | 94239962 | A            | 18.5         | 10.9 | 0.09 | 11.8          | 24.9 | 0.64 | 20.9             | 12.2 | 0.09 | 9.6          | 5   | 0.06 | 18.4          | 12.4 | 0.14 | 7.8              | 5.5 | 0.16 |
| IDE  | rs11187025 | 94247956 | T            | -3.2         | 4.9  | 0.52 | -4.1          | 8.4  | 0.62 | -3.3             | 6.1  | 0.59 | -1.3         | 2.2 | 0.55 | -1.3          | 3.7  | 0.73 | -1.4             | 2.8 | 0.61 |
| IDE  | rs7078413  | 94280464 | C            | -0.3         | 4.1  | 0.94 | -4.5          | 6.8  | 0.51 | 1.8              | 5.2  | 0.72 | -1.3         | 1.9 | 0.48 | -4.7          | 3    | 0.12 | 0.5              | 2.4 | 0.83 |
| IDE  | rs11187060 | 94294112 | T            | -4.5         | 3.9  | 0.25 | -8.1          | 6.3  | 0.2  | -2.4             | 5    | 0.63 | -2.3         | 1.8 | 0.2  | -5.6          | 2.9  | 0.05 | -0.5             | 2.3 | 0.85 |
| IDE  | rs11187062 | 94296406 | C            | -5.4         | 7    | 0.44 | -12.2         | 13   | 0.35 | -2               | 8.4  | 0.81 | -2.4         | 3.2 | 0.45 | 3.5           | 5.8  | 0.55 | -4.8             | 3.8 | 0.2  |
| IDE  | rs11187064 | 94298233 | C            | 0.3          | 4.9  | 0.94 | -4.1          | 8    | 0.61 | 2.3              | 6.2  | 0.71 | 0            | 2.2 | 0.99 | -0.9          | 3.6  | 0.8  | 0.4              | 2.8 | 0.88 |
| IDE  | rs2421943  | 94301795 | A            | 9.4          | 3.8  | 0.01 | 12.3          | 6.5  | 0.05 | 6.8              | 4.6  | 0.14 | 1.3          | 1.7 | 0.44 | 3.9           | 2.9  | 0.1  | 0.2              | 2.1 | 0.93 |
| IDE  | rs7908111  | 94304784 | A            | -4           | 4.7  | 0.4  | -5.1          | 7.5  | 0.5  | -3.1             | 6.2  | 0.62 | 1.8          | 2.1 | 0.41 | 0.7           | 3.4  | 0.83 | 2.5              | 2.8 | 0.37 |
| IDE  | rs1999763  | 94309972 | A            | -1.1         | 5.8  | 0.85 | -3.1          | 9.7  | 0.75 | 0.4              | 7.3  | 0.95 | -2.6         | 2.6 | 0.33 | -8.3          | 4.3  | 0.06 | 0.4              | 3.3 | 0.91 |
| IDE  | rs12264682 | 94312407 | A            | -21.8        | 9.1  | 0.02 | -21.9         | 14.9 | 0.15 | -22.7            | 11.7 | 0.05 | -7.1         | 4.2 | 0.09 | -11.5         | 6.8  | 0.09 | -4.6             | 5.3 | 0.3  |
| IDE  | rs7100623  | 94317136 | T            | -4           | 4.7  | 0.4  | -5.1          | 7.5  | 0.5  | -3.1             | 6.2  | 0.62 | 1.8          | 2.1 | 0.41 | 0.7           | 3.4  | 0.83 | 2.5              | 2.8 | 0.37 |

|        |            |          |   |      |      |      |      |      |      |      |      |      |      |     |      |      |      |      |      |     |      |
|--------|------------|----------|---|------|------|------|------|------|------|------|------|------|------|-----|------|------|------|------|------|-----|------|
| KIFF11 | rs6583826  | 94337810 | G | -6.2 | 3.5  | 0.08 | 5.6  | 5.6  | 0.32 | -6.7 | 4.5  | 0.14 | 0.4  | 1.6 | 0.82 | 0.5  | 2.6  | 0.86 | 0.8  | 2.1 | 0.69 |
| KIFF11 | rs12256435 | 94343258 | T | 5.3  | 6.1  | 0.39 | 3.3  | 10   | 0.74 | 5.9  | 7.9  | 0.46 | -0.7 | 2.8 | 0.81 | -3   | 4.5  | 0.51 | 0.5  | 3.6 | 0.89 |
| KIFF11 | rs3824735  | 94344184 | C | 2.6  | 4.1  | 0.53 | 3.5  | 7.2  | 0.63 | 1.9  | 5    | 0.7  | 1.5  | 1.8 | 0.43 | 5.4  | 3.2  | 0.1  | -0.1 | 2.3 | 0.96 |
| KIFF11 | rs11187094 | 94358158 | A | 5.9  | 5    | 0.24 | 9.7  | 8.2  | 0.24 | 3.6  | 6.3  | 0.57 | 1.5  | 2.3 | 0.51 | 6.8  | 3.7  | 0.07 | -1.4 | 2.9 | 0.64 |
| KIFF11 | rs10882088 | 94358568 | C | -2.9 | 5.7  | 0.61 | -1.2 | 9.7  | 0.9  | -3.4 | 7.1  | 0.63 | -3.7 | 2.6 | 0.15 | -8.2 | 4.3  | 0.06 | -1.5 | 3.2 | 0.64 |
| KIFF11 | rs2275220  | 94362686 | C | 14.7 | 10.7 | 0.17 | -4.6 | 22.8 | 0.84 | 20.9 | 12.2 | 0.09 | 8.3  | 4.9 | 0.09 | 9.5  | 11.1 | 0.39 | 7.8  | 5.5 | 0.16 |
| KIFF11 | rs10882091 | 94364357 | C | -1.7 | 3.9  | 0.66 | -1.6 | 6.4  | 0.8  | -1.9 | 5    | 0.7  | 1.1  | 1.8 | 0.53 | 0.7  | 2.9  | 0.81 | 1.3  | 2.3 | 0.57 |
| KIFF11 | rs7914814  | 94372930 | T | -1.7 | 3.9  | 0.66 | -1.6 | 6.4  | 0.8  | -1.9 | 5    | 0.7  | 1.1  | 1.8 | 0.53 | 0.7  | 2.9  | 0.81 | 1.3  | 2.3 | 0.57 |
| KIFF11 | rs11818705 | 94382708 | T | -4   | 4.6  | 0.39 | -3.6 | 8.1  | 0.66 | -3.9 | 5.7  | 0.49 | -1   | 2.1 | 0.64 | 0.5  | 3.6  | 0.88 | -1.6 | 2.6 | 0.54 |
| KIFF11 | rs7070990  | 94384580 | T | 1.1  | 3.9  | 0.78 | -2   | 7.1  | 0.77 | 2.6  | 4.8  | 0.59 | -0.2 | 1.7 | 0.89 | -0.8 | 2.9  | 0.8  | 0    | 2.2 | 0.99 |
| KIFF11 | rs6583830  | 94388098 | A | -1.6 | 3.9  | 0.68 | -1.3 | 6.4  | 0.84 | -1.9 | 5    | 0.7  | 1    | 1.8 | 0.57 | 0.4  | 2.8  | 0.89 | 1.3  | 2.3 | 0.57 |
| KIFF11 | rs7917359  | 94394804 | T | -2.8 | 4.5  | 0.54 | -1.4 | 7.6  | 0.85 | -3.2 | 5.7  | 0.57 | -0.9 | 2   | 0.65 | -0.2 | 3.4  | 0.96 | -1.2 | 2.6 | 0.64 |
| KIFF11 | rs7078243  | 94404243 | A | -1.7 | 3.7  | 0.65 | -1.9 | 6.3  | 0.76 | -1.5 | 4.6  | 0.74 | -0.2 | 1.6 | 0.92 | -2.6 | 2.8  | 0.36 | 0.9  | 2.1 | 0.65 |
| HHEX   | rs2275729  | 94442410 | C | 2.9  | 5.6  | 0.61 | 4.5  | 9.3  | 0.63 | 1.5  | 7.1  | 0.84 | -0.5 | 2.5 | 0.84 | -0.3 | 4.2  | 0.94 | -0.9 | 3.2 | 0.78 |
| HHEX   | rs7100035  | 94451033 | T | 0.1  | 8.3  | 0.99 | 4.2  | 14.5 | 0.77 | -1.4 | 10.2 | 0.89 | 2.9  | 3.7 | 0.44 | 3    | 6.5  | 0.65 | 3    | 4.5 | 0.51 |
| HHEX   | rs1111875  | 94452862 | A | 3.2  | 3.9  | 0.41 | 2.3  | 7.2  | 0.75 | 3.5  | 4.8  | 0.46 | 2.3  | 1.8 | 0.19 | 5.3  | 3.3  | 0.11 | 1.2  | 2.1 | 0.57 |
| HHEX   | rs12778642 | 94454287 | T | 2.8  | 3.8  | 0.46 | 5    | 6.4  | 0.43 | 1.6  | 4.7  | 0.73 | 3    | 1.7 | 0.08 | 6    | 2.9  | 0.04 | 1.6  | 2.1 | 0.46 |
| HHEX   | rs5015480  | 94455539 | T | 2.7  | 3.7  | 0.46 | 2.7  | 6    | 0.66 | 2.9  | 4.7  | 0.53 | 1.9  | 1.7 | 0.27 | 2.5  | 2.8  | 0.36 | 1.6  | 2.1 | 0.45 |

Beta = regression coefficient; SE=standard error; p=nominal p-value
